# Supplementary material
Source: PubMed Central journal article supplement (PMC4493327)
Supplement: ACI-06-0224-s001.pdf [file ACI-06-0224-s001.pdf]

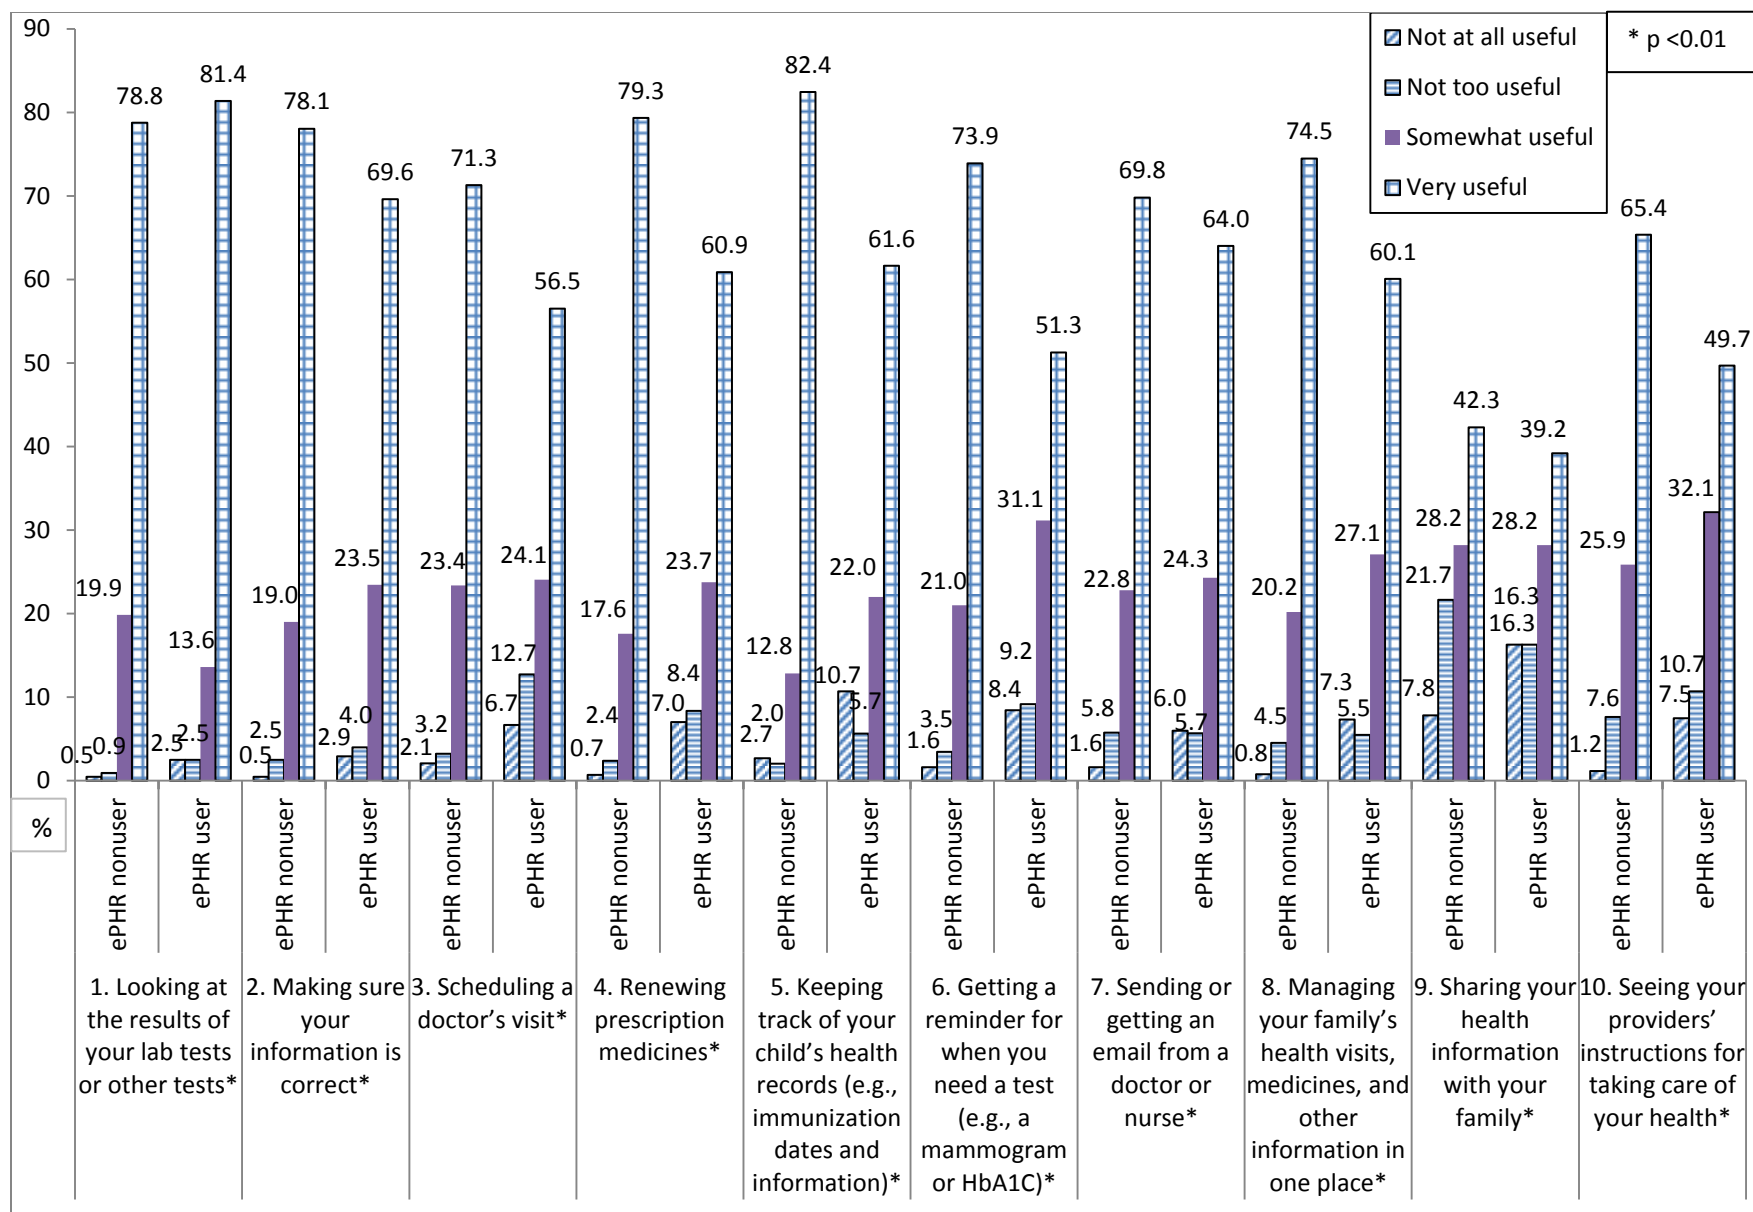

**Supplemental Figure 1 Proportion Perceived Usefulness of ePHR Feature among Users and Nonuser**
